# Supplementary material
Source: PubMed Central journal article supplement (PMC2715478)
Supplement: 0905922106_0905922106SI.pdf [file 0905922106_0905922106SI.pdf]

# Supporting Information

Lozovsky et al. 10.1073/pnas.0905922106

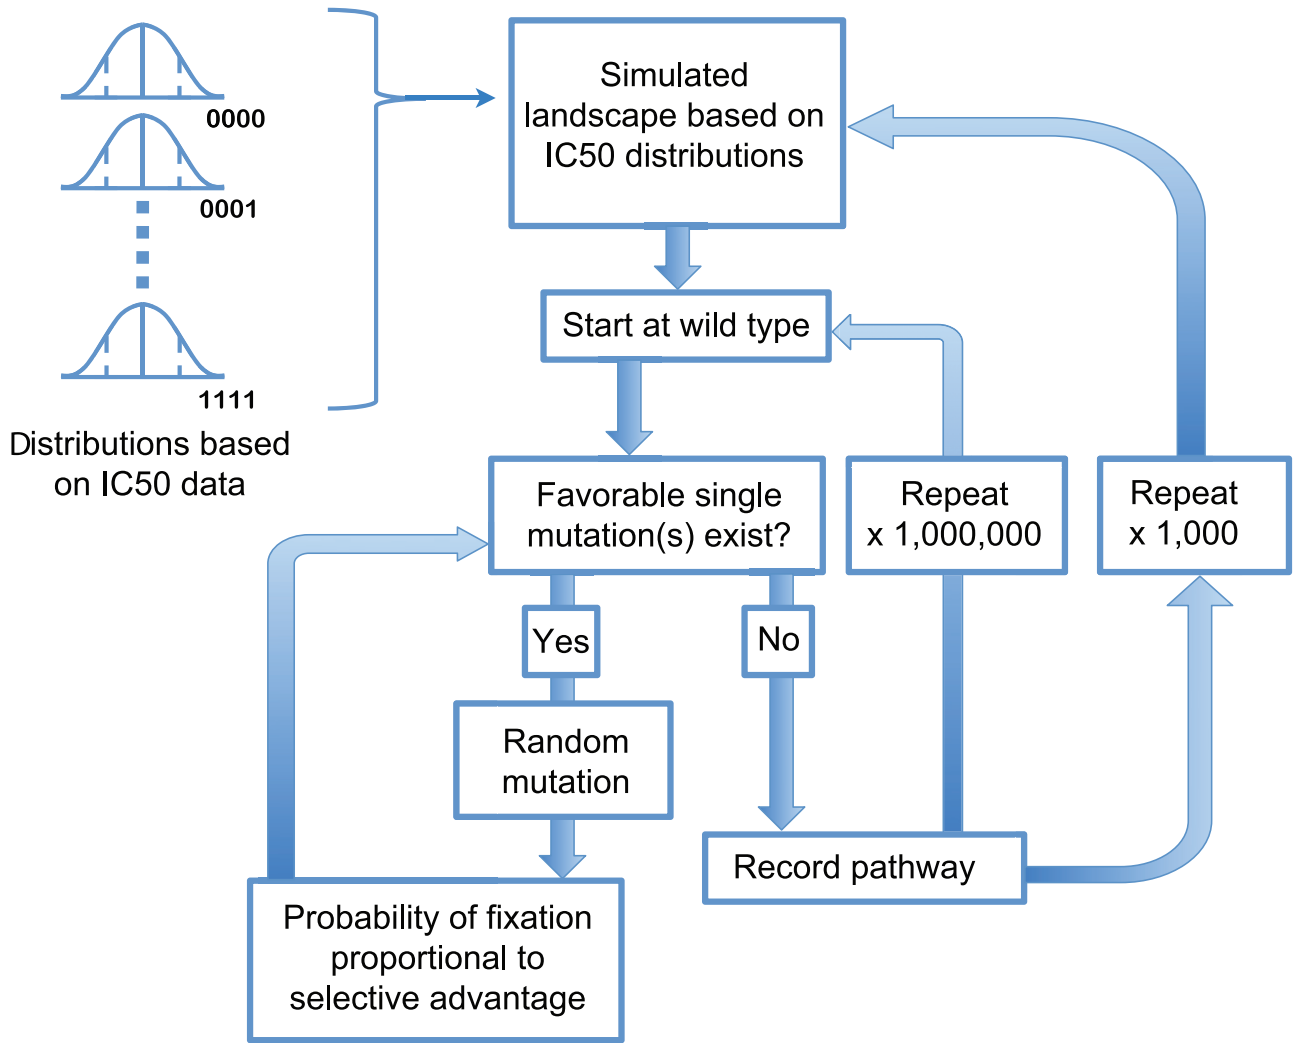

Fig. S1. Flow chart of the algorithm used in the computer simulations.

**Table S1. Comparison of IC<sub>50</sub> and MIC**

| Allele | IC <sub>50</sub> | SD    | MIC | Rank IC <sub>50</sub> | Rank MIC |
|--------|------------------|-------|-----|-----------------------|----------|
| 0000   | 0.27             | 0.04  | 75  | 2                     | 4.5      |
| 1000   | 0.36             | 0.03  | 25  | 4                     | 1.5      |
| 0100   | 2.04             | 0.65  | 50  | 5                     | 3        |
| 0010   | 9.56             | 0.95  | 150 | 8                     | 6        |
| 0001   | 0.29             | 0.05  | 75  | 3                     | 4.5      |
| 1100   | 4.89             | 0.80  | 425 | 6                     | 9        |
| 1010   | 37.67            | 0.58  | 800 | 9                     | 11.5     |
| 1001   | 102.67           | 1.53  | 800 | 12                    | 11.5     |
| 0110   | 147.00           | 3.79  | 850 | 13                    | 13.5     |
| 0101   | 7.28             | 0.37  | 550 | 7                     | 10       |
| 0011   | 0.00             | 0.00  | 25  | 1                     | 1.5      |
| 1110   | 242.17           | 8.47  | 950 | 15                    | 15       |
| 1101   | 56.00            | 1.73  | 350 | 10                    | 8        |
| 1011   | 56.83            | 0.77  | 325 | 11                    | 7        |
| 0111   | 195.25           | 10.05 | 850 | 14                    | 13.5     |
| 1111   | 300.12           | 7.46  | 975 | 16                    | 16       |

IC<sub>50</sub> is the concentration of pyrimethamine that inhibits growth to 50% of its level in the absence of drug; MIC is the minimal concentration of pyrimethamine that completely inhibits growth. Each allele is designated as a vector of 0's and 1's corresponding left-to-right to DHFR amino acid replacements N51I, C59R, S108N, and I164L. At each site, 0 denotes the amino acid at the left (nonmutant), and 1 denotes the amino acid on the right (mutant). Units of IC<sub>50</sub>, the SD of IC<sub>50</sub>, and MIC are all in  $\mu\text{g/mL}$  of pyrimethamine. The IC<sub>50</sub> values in this table are in good agreement with those expected from the  $K_i$  and  $K_m$  values estimated in vitro previously [Sirawaraporn W, Sathitkul T, Sirawaraporn R, Yuthavong Y, Santi DV (1997) Antifolate-resistant mutants of *Plasmodium falciparum* dihydrofolate reductase. *Proc Natl Acad Sci USA* 94:1124—1129].

**Table S2. Growth rates in the absence of pyrimethamine**

| Allele | Relative GR | 95% CI |
|--------|-------------|--------|
| 0000   | 1.002       | 0.117  |
| 1000   | 1.102       | 0.253  |
| 0100   | 1.193       | 0.117  |
| 0010   | 1.102       | 0.171  |
| 0001   | 0.969       | 0.104  |
| 1100   | 1.822       | 0.174  |
| 1010   | 0.794       | 0.071  |
| 1001   | 1.262       | 0.137  |
| 0110   | 1.149       | 0.110  |
| 0101   | 1.554       | 0.265  |
| 0011   | 0.170       | 0.041  |
| 1110   | 1.429       | 0.145  |
| 1101   | 1.285       | 0.226  |
| 1011   | 0.651       | 0.072  |
| 0111   | 1.274       | 0.127  |
| 1111   | 0.860       | 0.082  |

GR denotes the growth rate of strains carrying each allele, relative to that of a strain carrying the nonmutant allele (0000). Allele designations are as in Table S1. The column headed "95% CI" gives minus/plus deviation from the mean that yields the 95% confidence interval around each estimate.

**Table S3. Normalized mutation matrix for *P. falciparum***

| Original nucleotide | Mutant nucleotide |       |       |       |
|---------------------|-------------------|-------|-------|-------|
|                     | A                 | T     | G     | C     |
| A                   | —                 | 0.056 | 0.049 | 0.021 |
| T                   | 0.067             | —     | 0.018 | 0.049 |
| G                   | 0.178             | 0.109 | —     | 0.050 |
| C                   | 0.090             | 0.255 | 0.058 | —     |

Single-nucleotide polymorphisms in isolates of *P. falciparum* were identified using standard neighborhood quality-score criteria relative to the 3D7 reference sequence (base quality score  $\geq$  Q20 for both alleles, no other SNPs within 5 bp), and rooted by assuming that the sequence of *P. reichenowi*, a parasite of chimpanzees, is ancestral. We limited the analysis to intergenic SNPs on the assumption that this sequence class would be least affected by selection and thus would most accurately reflect the profile of new mutations. We identified a total of 1,105 SNPs in intergenic regions of the *P. falciparum* genome for which a high-confidence *P. reichenowi* genotype was available. Observed intergenic SNP counts for each mutational type were scaled according to the overall abundance of the ancestral nucleotide in intergenic regions of the *P. falciparum* genome (A, 43.1%; T, 43.1%; C, 6.9%; G, 7.0%). The scaled mutation rates were then normalized so that the sum of all rates was equal to 1.

**Table S4. Cited sources of polymorphic DHFR alleles in *P. falciparum***

| Allele                       | Location (ref.)                                                                                                                                                                          |
|------------------------------|------------------------------------------------------------------------------------------------------------------------------------------------------------------------------------------|
| S108N (0010)                 | Indonesia (1), Philippines (1), Cameroon (2), Burkina Faso (3), Bangladesh (4), Senegal (5), Sudan (6)                                                                                   |
| N511/S108N (1010)            | Kenya (7), Burkina Faso (3), Cameroon (2), Sudan (6), Ethiopia (8), India (9)                                                                                                            |
| C59R/S108N (0110)            | Laos (1), Indonesia (1), Thailand (1), Philippines (1), Kenya (7), Cameroon (2), Bangladesh (4), Sudan (6), Iran (10), India (9)                                                         |
| N511/C59R/S108N (1110)       | Senegal (5), Sudan (6), Ethiopia (8), Kenya (7), Zambia (11), Benin (12), Cameroon (12), Ivory Coast (12), Gabon (12), Guinea (12), Mali (12), Uganda (12), Thailand (1), Bangladesh (4) |
| C59R/S108N/I164L (0111)      | Bangladesh (4), Iran (10), India (9)                                                                                                                                                     |
| N511/C59R/S108N/I164L (1111) | Bangladesh (4), India (9), Thailand (13)                                                                                                                                                 |

- Saito-Nakano Y, et al. (2008) Genetic evidence for *Plasmodium falciparum* resistance to chloroquine and pyrimethamine in Indochina and the Western Pacific between 1984 and 1998. *Am J Trop Med Hyg* 79:613–619.
- Tahar R, Basco LK (2006) Molecular epidemiology of malaria in Cameroon, XXII: Geographic mapping and distribution of *Plasmodium falciparum* dihydrofolate reductase (dhfr) mutant alleles. *Am J Trop Med Hyg* 75:396–401.
- Tinto H, et al. (2007) Sulfadoxine-pyrimethamine efficacy and selection of *Plasmodium falciparum* DHFR mutations in Burkina Faso before its introduction as intermittent preventive treatment for pregnant women. *Am J Trop Med Hyg* 76:608–613.
- van den Broek IV, et al. (2004) Drug resistance in *Plasmodium falciparum* from the Chittagong Hill tracts, Bangladesh. *Trop Med Int Health* 9:680–687.
- Ndiaye D, et al. (2006) Defining the origin of *Plasmodium falciparum*-resistant dhfr isolates in Senegal. *Acta Trop* 99:106–111.
- Anderson TJ, Nair S, Jacobzone C, Zavai A, Balkan S (2003) Molecular assessment of drug resistance in *Plasmodium falciparum* from Bahr El Gazal province, Sudan. *Trop Med Int Health* 8:1068–1073.
- Certain LK, et al. (2008) Characteristics of *Plasmodium falciparum* dhfr haplotypes that confer pyrimethamine resistance, Kilifi, Kenya, 1987–2006. *J Infect Dis* 197:1743–1751.
- Gebru-Woldearegai T, Hailu A, Grobusch MP, Kun JF (2005) Molecular surveillance of mutations in dihydrofolate reductase and dihydropteroate synthase genes of *Plasmodium falciparum* in Ethiopia. *Am J Trop Med Hyg* 73:1131–1134.
- Ahmed A, et al. (2006) Quadruple mutations in dihydrofolate reductase of *Plasmodium falciparum* isolates from Car Nicobar Island, India. *Antimicrob Agents Chemother* 50:1546–1549.
- Heidari A, et al. (2007) Genotypes and in vivo resistance of *Plasmodium falciparum* isolates in an endemic region of Iran. *Parasitol Res* 100:589–592.
- Mkulama MA, et al. (2008) Escalating *Plasmodium falciparum* antifolate drug resistance mutations in Macha, rural Zambia. *Malar J* 7:87.
- Maiga O, et al. (2007) A shared Asian origin of the triple-mutant dhfr allele in *Plasmodium falciparum* from sites across Africa. *J Infect Dis* 196:165–172.
- Anderson TJ, et al. (2005) Geographical distribution of selected and putatively neutral SNPs in Southeast Asian malaria parasites. *Mol Biol Evol* 22:2362–2374.
